# Supplementary material
Source: PubMed Central journal article supplement (PMC5730991)

Received XXXX

(www.interscience.wiley.com) DOI: 10.1002/sim.0000

# Supplementary Materials for “Blood pressure and the risk of Chronic Kidney Disease progression using multistate marginal structural models in the CRIC Study”

Alisa J. Stephens-Shields<sup>\*†</sup>, Andrew J. Spieker<sup>†</sup>, Amanda Anderson<sup>†</sup>  
Paul Drawz<sup>§</sup>, Michael Fischer<sup>¶</sup>, Stephen M. Sozio<sup>||</sup>, Harold Feldman<sup>†</sup>,  
Marshall Joffe<sup>†</sup>, Wei Yang<sup>†††</sup>, Tom Greene<sup>\*\*††</sup>, and the CRIC Study  
Investigators<sup>‡</sup>

## 1. Estimating marginal probabilities $P(Y_{i,J+1}^{\bar{a}} = k)$

Below we show how to obtain the  $P(Y_{i,J+1}^{\bar{a}} = k)$  marginal probabilities from the MS-MSM estimates. We first note that the marginal probabilities of potential outcome states are determined by

John Wiley & Sons, Ltd, The Atrium, Southern Gate, Chichester, West Sussex, PO19 8SQ, UK

\*Correspondence to: Department of Biostatistics and Epidemiology, University of Pennsylvania, Philadelphia, PA, 19104

†Department of Biostatistics and Epidemiology, Perelman School of Medicine, University of Pennsylvania

§Department of Medicine, University of Minnesota

¶Department of Medicine, University of Illinois College of Medicine

||Department of Medicine, Johns Hopkins University School of Medicine

\*\*Department of Population Health Sciences, University of Utah School of Medicine

‡The CRIC Study Investigators: Lawrence J. Appel, MD, MPH, Alan S. Go, MD, Jiang He, MD, PhD, John W. Kusek, PhD, James P. Lash, MD, Akinlolu Ojo, MD, PhD, Mahboob Rahman, MD, Raymond R. Townsend, MD

††Wei Yang and Tom Greene contributed equally to this manuscript

$$\begin{aligned}
 P(Y_{j+1}^{\bar{a}} = k) &= \sum_{\omega \in \Omega} P(Y_{j+1}^{\bar{a}} = k | \bar{Y}_j^{\bar{a}} = \mathbf{y}_j^{\bar{a}}) P(\bar{Y}_j^{\bar{a}} = \mathbf{y}_j^{\bar{a}}) \\
 &= \sum_{k'_j=1}^K P(Y_{j+1}^{\bar{a}} = k | Y_j^{\bar{a}} = k'_j) P(Y_j^{\bar{a}} = k'_j) \\
 &= \sum_{k'_j=1}^K P(Y_{j+1}^{\bar{a}} = k | Y_j^{\bar{a}} = k'_j) \left\{ \sum_{k'_{j-1}=1}^K P(Y_j^{\bar{a}} = k'_j | Y_{j-1}^{\bar{a}} = k'_{j-1}) P(Y_{j-1}^{\bar{a}} = k'_{j-1}) \right\} \\
 &= \sum_{k'_j=1}^K P(Y_{j+1}^{\bar{a}} = k | Y_j^{\bar{a}} = k'_j) \left\{ \sum_{k'_{j-1}=1}^K P(Y_j^{\bar{a}} = k'_j | Y_{j-1}^{\bar{a}} = k'_{j-1}) \left\{ \sum_{k'_{j-2}=1}^K P(Y_{j-1}^{\bar{a}} = k'_{j-1} | Y_{j-2}^{\bar{a}} = k'_{j-2}) \right\} \dots \right. \\
 &\quad \left. \left\{ \sum_{k'_1=1}^K P(Y_1^{\bar{a}} = k'_1 | Y_0^{\bar{a}} = k_0) P(Y_0^{\bar{a}} = k_0) \right\} \right\} \right\} \right\} \quad (1)
 \end{aligned}$$

where  $\Omega$  describes the set of possible values of the history of responses  $\bar{Y}^{\bar{a}}$ , and the first equality follows from the first-order Markov assumption. The second and third equalities follow from repeated application of the law of total probability. It remains to show that the product of transition intensity matrices  $\Lambda_{j+1}^{\bar{a}} = \prod_{j=0}^j \lambda_{j+1}^{\bar{a}}$ , yields (1).

Let  $\gamma_0 = (\gamma_0^1, \gamma_0^2, \dots, \gamma_0^K)^T = (P(Y_0 = 1), P(Y_0 = 2), \dots, P(Y_0 = K))^T$  define the marginal distribution of  $Y_0$  and  $\lambda_1^{\bar{a}}$  be the  $K \times K$  transition intensity matrix that characterizes the state transition from time  $j = 0$  to time  $j + 1 = 1$  under the joint exposure  $\bar{a}$ , and  $\lambda_2^{\bar{a}}$  similarly characterizes the transition intensity matrix from time  $j = 1$  to time  $j + 1 = 2$ . We have

$$\Lambda_{J+1}^{\bar{a}} = \gamma_0^T \prod_{j=0}^J \lambda_{j+1}^{\bar{a}} \tag{2}$$

$$= \begin{bmatrix} \gamma_0^1 & \gamma_0^2 & \dots & \gamma_0^K \end{bmatrix} \begin{bmatrix} \lambda_1^{\bar{a},1,1} & \lambda_1^{\bar{a},1,2} & \dots & \lambda_1^{\bar{a},1,K} \\ \lambda_1^{\bar{a},2,1} & \lambda_1^{\bar{a},2,2} & \dots & \lambda_1^{\bar{a},2,K} \\ \vdots & \ddots & \ddots & \vdots \\ \lambda_1^{\bar{a},K,1} & \lambda_1^{\bar{a},K,2} & \dots & \lambda_1^{\bar{a},K,K} \end{bmatrix} \begin{bmatrix} \lambda_2^{\bar{a},1,1} & \lambda_2^{\bar{a},1,2} & \dots & \lambda_2^{\bar{a},1,K} \\ \lambda_2^{\bar{a},2,1} & \lambda_2^{\bar{a},2,2} & \dots & \lambda_2^{\bar{a},2,K} \\ \vdots & \ddots & \ddots & \vdots \\ \lambda_2^{\bar{a},K,1} & \lambda_2^{\bar{a},K,2} & \dots & \lambda_2^{\bar{a},K,K} \end{bmatrix} \times \dots \tag{3}$$

$$\times \begin{bmatrix} \lambda_2^{\bar{a},1,1} & \lambda_2^{\bar{a},1,2} & \dots & \lambda_2^{\bar{a},1,K} \\ \lambda_2^{\bar{a},2,1} & \lambda_2^{\bar{a},2,2} & \dots & \lambda_2^{\bar{a},2,K} \\ \vdots & \ddots & \ddots & \vdots \\ \lambda_2^{\bar{a},K,1} & \lambda_2^{\bar{a},K,2} & \dots & \lambda_2^{\bar{a},K,K} \end{bmatrix} \tag{4}$$

$$= \left[ \sum_{k'_0=1}^K \gamma_0^{k'_0} \lambda_1^{\bar{a},k'_0,1} \sum_{k'_0=1}^K \gamma_0^{k'_0} \lambda_2^{\bar{a},k'_0,2} \dots \sum_{k'_0=1}^K \gamma_0^{k'_0} \lambda_1^{\bar{a},k'_0,K} \right] \times \begin{bmatrix} \lambda_2^{\bar{a},1,1} & \lambda_2^{\bar{a},1,2} & \dots & \lambda_2^{\bar{a},1,K} \\ \lambda_2^{\bar{a},2,1} & \lambda_2^{\bar{a},2,2} & \dots & \lambda_2^{\bar{a},2,K} \\ \vdots & \ddots & \ddots & \vdots \\ \lambda_2^{\bar{a},K,1} & \lambda_2^{\bar{a},K,2} & \dots & \lambda_2^{\bar{a},K,K} \end{bmatrix} \times \dots \tag{5}$$

$$\times \begin{bmatrix} \lambda_J^{\bar{a},1,1} & \lambda_J^{\bar{a},1,2} & \dots & \lambda_J^{\bar{a},1,K} \\ \lambda_J^{\bar{a},2,1} & \lambda_J^{\bar{a},2,2} & \dots & \lambda_J^{\bar{a},2,K} \\ \vdots & \ddots & \ddots & \vdots \\ \lambda_J^{\bar{a},K,1} & \lambda_J^{\bar{a},K,2} & \dots & \lambda_J^{\bar{a},K,K} \end{bmatrix} \tag{6}$$

$$= \left[ \sum_{k'_1=1}^K \lambda^{\bar{a},k'_1,1} \left\{ \sum_{k'_0=1}^K \gamma_0^{k'_0} \lambda_1^{\bar{a},k'_0,k'_1} \right\} \sum_{k'_1=1}^K \lambda^{\bar{a},k'_1,2} \left\{ \sum_{k'_0=1}^K \gamma_0^{k'_0} \lambda_1^{\bar{a},k'_0,k'_1} \right\} \dots \sum_{k'_1=1}^K \lambda^{\bar{a},k'_1,K} \left\{ \sum_{k'_0=1}^K \gamma_0^{k'_0} \lambda_1^{\bar{a},k'_0,k'_1} \right\} \right] \times \dots \tag{7}$$

$$\times \begin{bmatrix} \lambda_J^{\bar{a},1,1} & \lambda_J^{\bar{a},1,2} & \dots & \lambda_J^{\bar{a},1,K} \\ \lambda_J^{\bar{a},2,1} & \lambda_J^{\bar{a},2,2} & \dots & \lambda_J^{\bar{a},2,K} \\ \vdots & \ddots & \ddots & \vdots \\ \lambda_J^{\bar{a},K,1} & \lambda_J^{\bar{a},K,2} & \dots & \lambda_J^{\bar{a},K,K} \end{bmatrix} \tag{8}$$

$$= \left[ \begin{array}{l} \sum_{k'_j=1}^K \lambda^{\bar{a},k'_j,1} \left\{ \sum_{k'_{j-1}=1}^K \lambda^{\bar{a},k'_{j-1},k'_j} \dots \left\{ \sum_{k'_1=1}^K \lambda^{\bar{a},k'_1,k'_2} \left\{ \sum_{k'_0=1}^K \gamma_0^{k'_0} \lambda_1^{\bar{a},k'_0,k'_1} \right\} \right\} \right\} \\ \sum_{k'_j=1}^K \lambda^{\bar{a},k'_j,2} \left\{ \sum_{k'_{j-1}=1}^K \lambda^{\bar{a},k'_{j-1},k'_j} \dots \left\{ \sum_{k'_1=1}^K \lambda^{\bar{a},k'_1,k'_2} \left\{ \sum_{k'_0=1}^K \gamma_0^{k'_0} \lambda_1^{\bar{a},k'_0,k'_1} \right\} \right\} \right\} \\ \vdots \\ \sum_{k'_j=1}^K \lambda^{\bar{a},k'_j,K} \left\{ \sum_{k'_{j-1}=1}^K \lambda^{\bar{a},k'_{j-1},k'_j} \dots \left\{ \sum_{k'_1=1}^K \lambda^{\bar{a},k'_1,k'_2} \left\{ \sum_{k'_0=1}^K \gamma_0^{k'_0} \lambda_1^{\bar{a},k'_0,k'_1} \right\} \right\} \right\} \end{array} \right]^T \tag{9}$$

where the  $k^{th}$  element of the  $1 \times K$  vector  $\Lambda_{J+1}^{\bar{a}}$  indicates  $P(Y_{i,J+1}^{\bar{a}} = k)$ .

## 2. Distribution of inverse probability weights pre- and post-truncation in application of MS-MSMs to the CRIC study

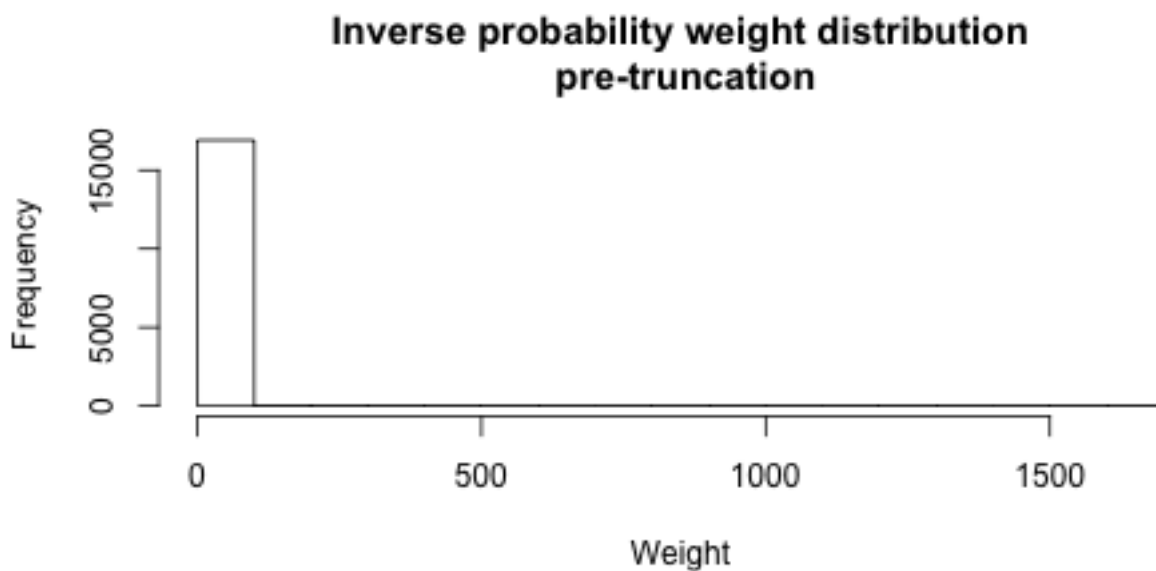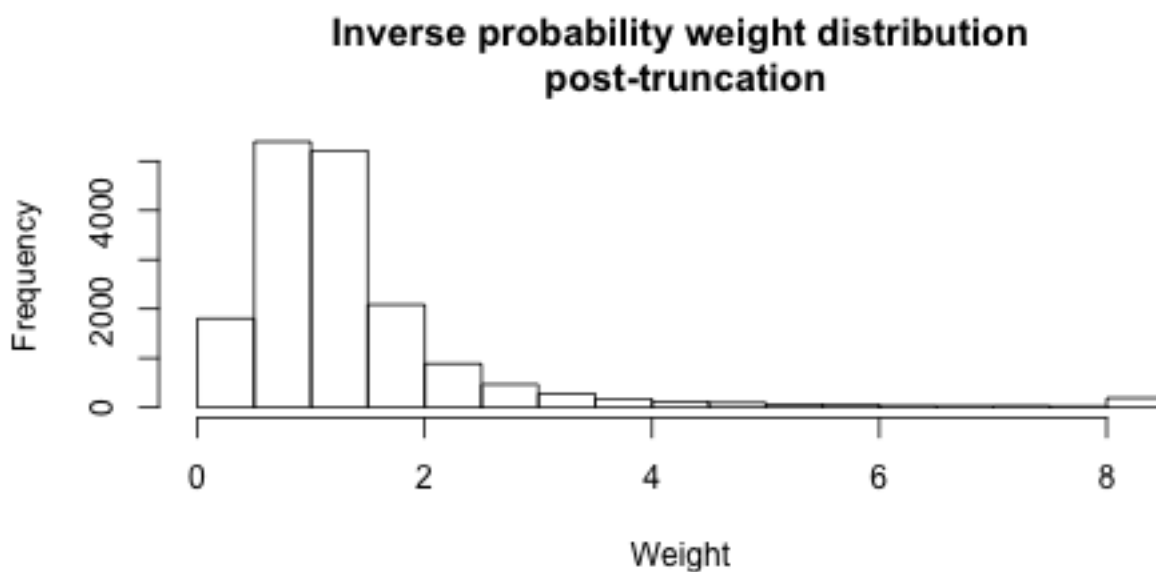

Supplement: NIHMS894357-supplement-Supplementary_Materials.pdf [file NIHMS894357-supplement-Supplementary_Materials.pdf]
